# Supplementary material for: A systematic assessment of the impact of rare canonical splice site variants on splicing using functional and in silico methods
Source: PubMed Central journal article supplement — HGG Adv. 2024 Apr 24;5(3):100299. doi: 10.1016/j.xhgg.2024.100299 (PMC11144818; doi:10.1016/j.xhgg.2024.100299), 2024-04-24
Supplement: mmc1.pdf [file mmc1.pdf]

HGGA, Volume 5

## Supplemental information

### **A systematic assessment of the impact of rare canonical splice site variants on splicing using functional and *in silico* methods**

**Rachel Y. Oh, Ali AlMail, David Cheerie, George Guirguis, Huayun Hou, Kyoko E. Yuki, Bushra Haque, Bhooma Thiruvahindrapuram, Christian R. Marshall, Roberto Mendoza-Londono, Adam Shlien, Lianna G. Kyriakopoulou, Susan Walker, James J. Dowling, Michael D. Wilson, and Gregory Costain**

**Figure S1.** CSSV location by RNA-seq frameshift/NMD or non-frameshift/no NMD outcome.

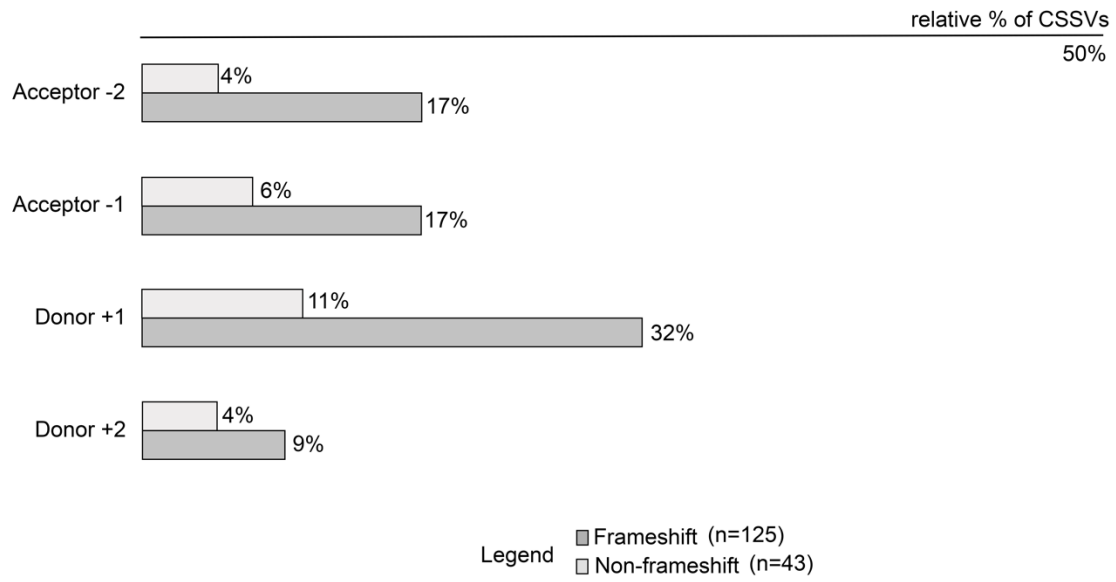

**Figure S2.** Specific nucleotide substitution of CSSVs by RNA-seq frameshift/NMD or non-frameshift/no NMD outcome.

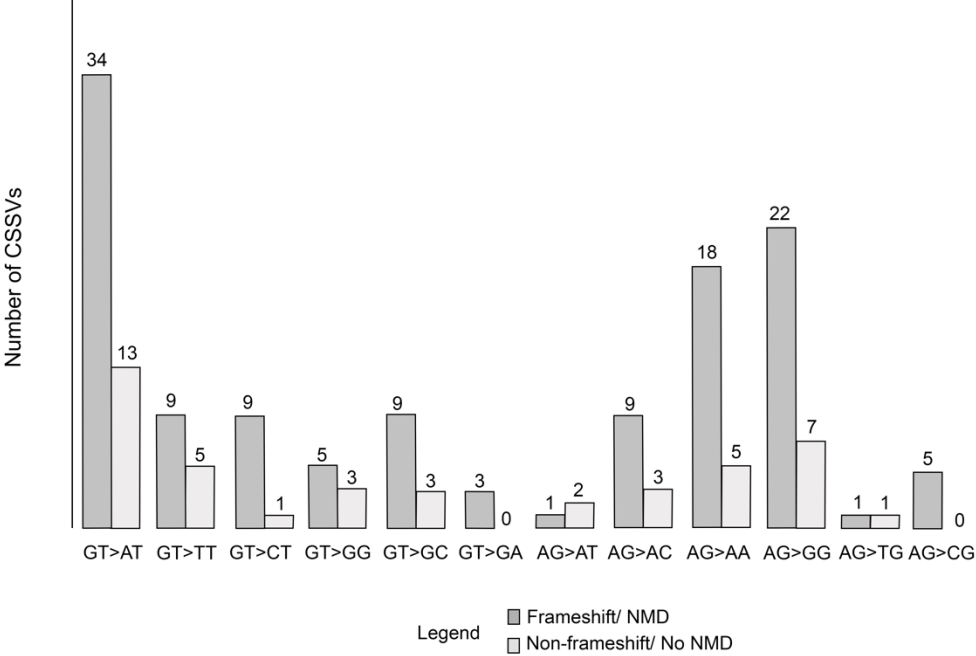

**Figure S3.** CSSVs that showed only WT splicing and comparable read depth to controls by RNA-seq (outcome category B, see main text for details).

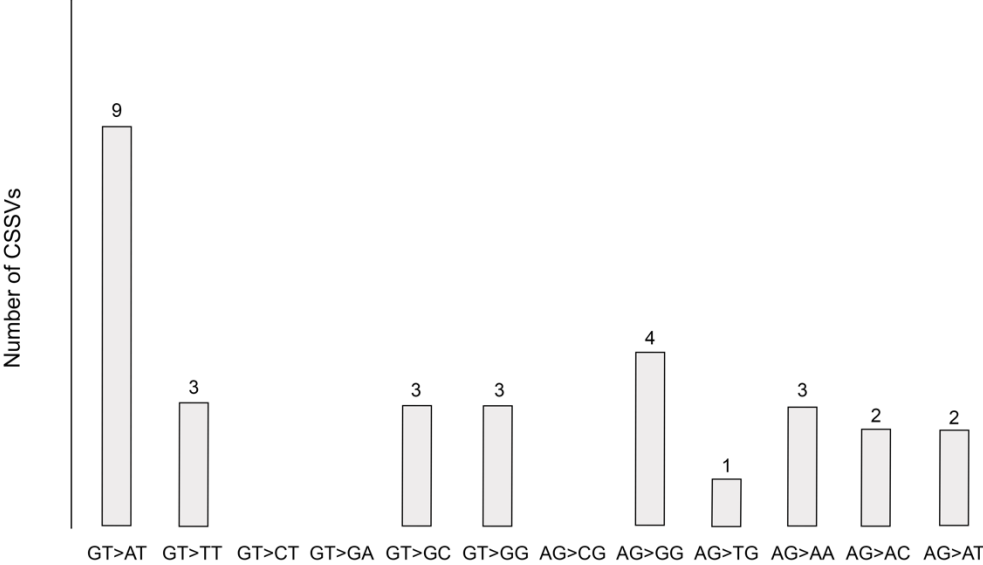

**Figure S4.** Scatterplot of gnomAD v2.1 genome allele frequencies for the 168 CSSVs considered in this study.

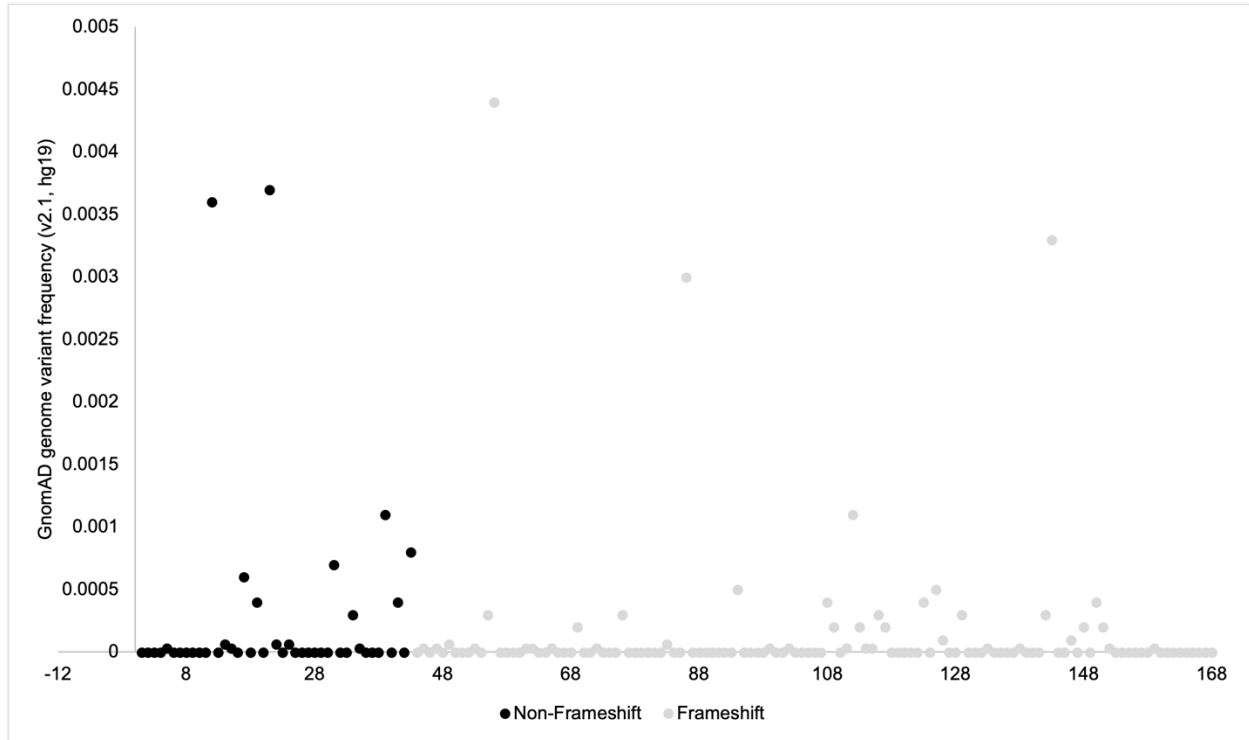

Figure legend: Each column on the x-axis represents a single variant. Within each of the non-frameshift/no NMD variant category (left side of the figure; dark circles) and the frameshift/NMD variant category (right side of the figure; gray circles), variants were ordered alphabetically by gene symbol. There was no significant difference in allele frequencies between the variants that were and were not resulting in a frameshift/NMD per RNA-seq (Mann Whitney U-test p-value =0.5287).

**Table S1.** Demographics of the study cohort.

|                                            | <b>Individuals (N=112)</b> |
|--------------------------------------------|----------------------------|
| <b>Sex</b>                                 | <b>n (%)</b>               |
| <hr/>                                      |                            |
| <b>Sex</b>                                 |                            |
| Male                                       | 57 (50.9%)                 |
| Female                                     | 55 (49.1%)                 |
| <hr/>                                      |                            |
| <b>Age at RNA-seq Requisition</b>          |                            |
| <1                                         | 12 (10.7%)                 |
| 1 to 5                                     | 34 (30.4%)                 |
| 6 to 10                                    | 25 (22.3%)                 |
| 11 to 17                                   | 22 (19.6%)                 |
| >19                                        | 19 (17.0%)                 |
| <hr/>                                      |                            |
| <b>Ancestry</b>                            |                            |
| East Asian                                 | 4 (3.6%)                   |
| African                                    | 2 (1.8%)                   |
| Latino/a                                   | 3 (2.7%)                   |
| Ashkenazi Jewish                           | 5 (4.5%)                   |
| European                                   | 55 (49.1%)                 |
| South Asian                                | 19 (17.0%)                 |
| Middle Eastern                             | 7 (6.3%)                   |
| Other/ Mixed                               | 17 (15.2%)                 |
| <hr/>                                      |                            |
| <b>Molecular diagnosis</b>                 |                            |
| Yes, not via CSSV in blood expressed genes | 40 (35.7%)                 |
| Yes, via CSSV in blood expressed gene      | 2 (1.8%)                   |
| No                                         | 70 (62.5%)                 |
| <hr/>                                      |                            |
| <b>Relationship to others in cohort</b>    |                            |
| Proband                                    | 93 (83.0%)                 |
| Parent                                     | 16 (14.3%)                 |
| Affected Sibling                           | 3 (2.7%)                   |

**Table S2.** Please see attached .xls file for an annotated list of the 168 CSSVs studied in this report, including splicing outcomes using RNA-seq and *in silico* predictions.
